# Supplementary material for: Data-driven approach for the prediction of mechanical properties of carbon fiber reinforced composites
Source: Royal Society of Chemistry journal article supplement (doi:10.1039/d2ma00698g), 2022-01-01
Supplement: d2ma00698g1.pdf [file d2ma00698g1.pdf]

## Supplementary Information

**Paper title:** Data-Driven Approach for the Prediction of Mechanical Properties of Carbon Fiber Reinforced Composites

**Authors:** Vade Shah, Steven Zadourian, Charles Yang, Zilan Zhang, and Grace Gu

### Supporting figures and tables

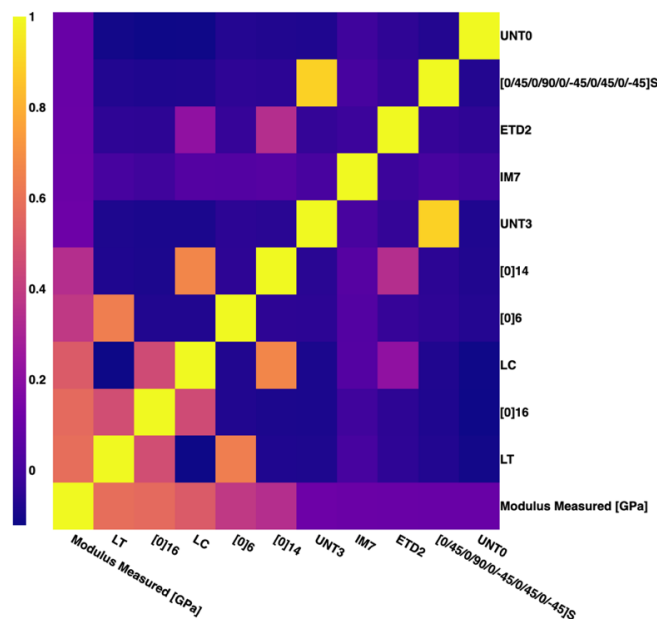

**Figure S1:** Correlation heatmap between the ten variables that correlate most with modulus.



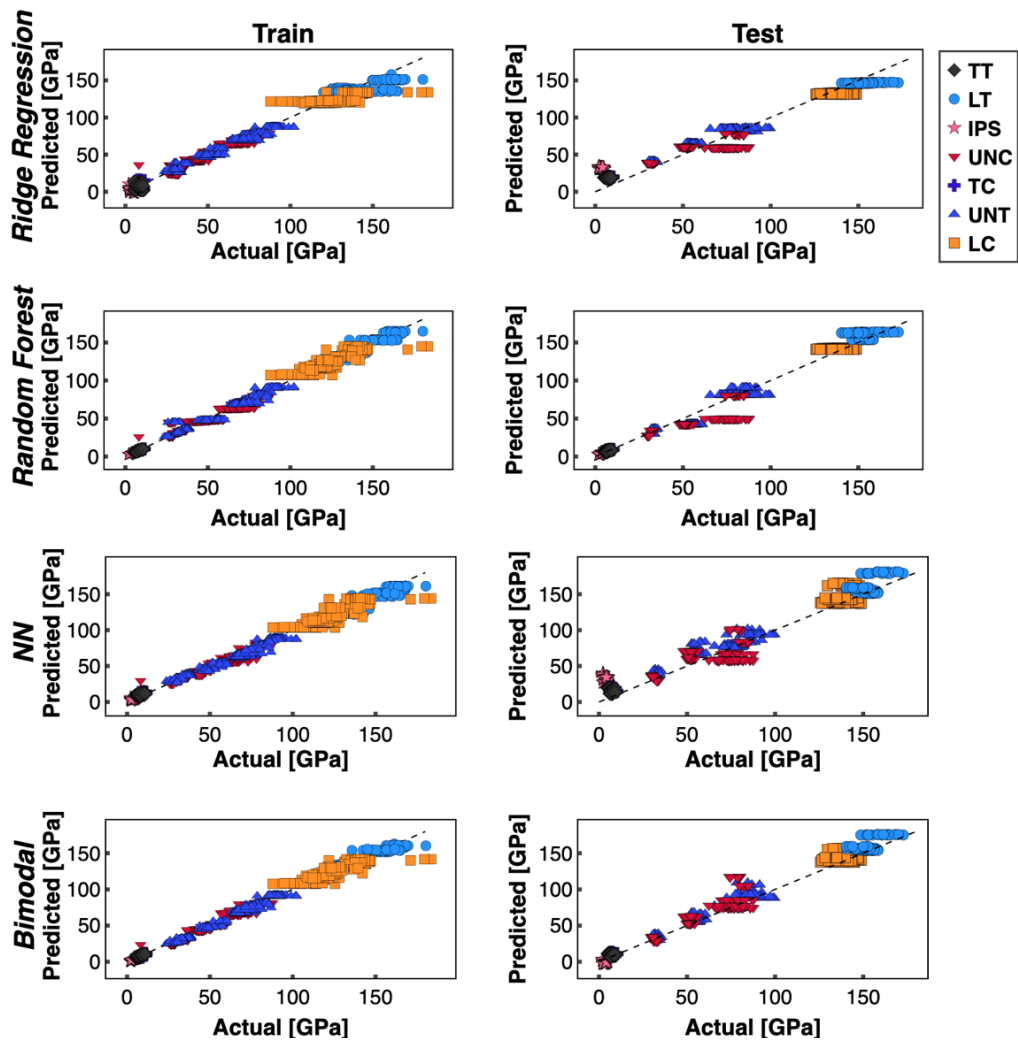

**Figure S3:** Training and testing results for all models. Modulus predicted by model is plotted against true modulus value across all models. For these data, the IM7 MTM45-1 material has been left for testing.

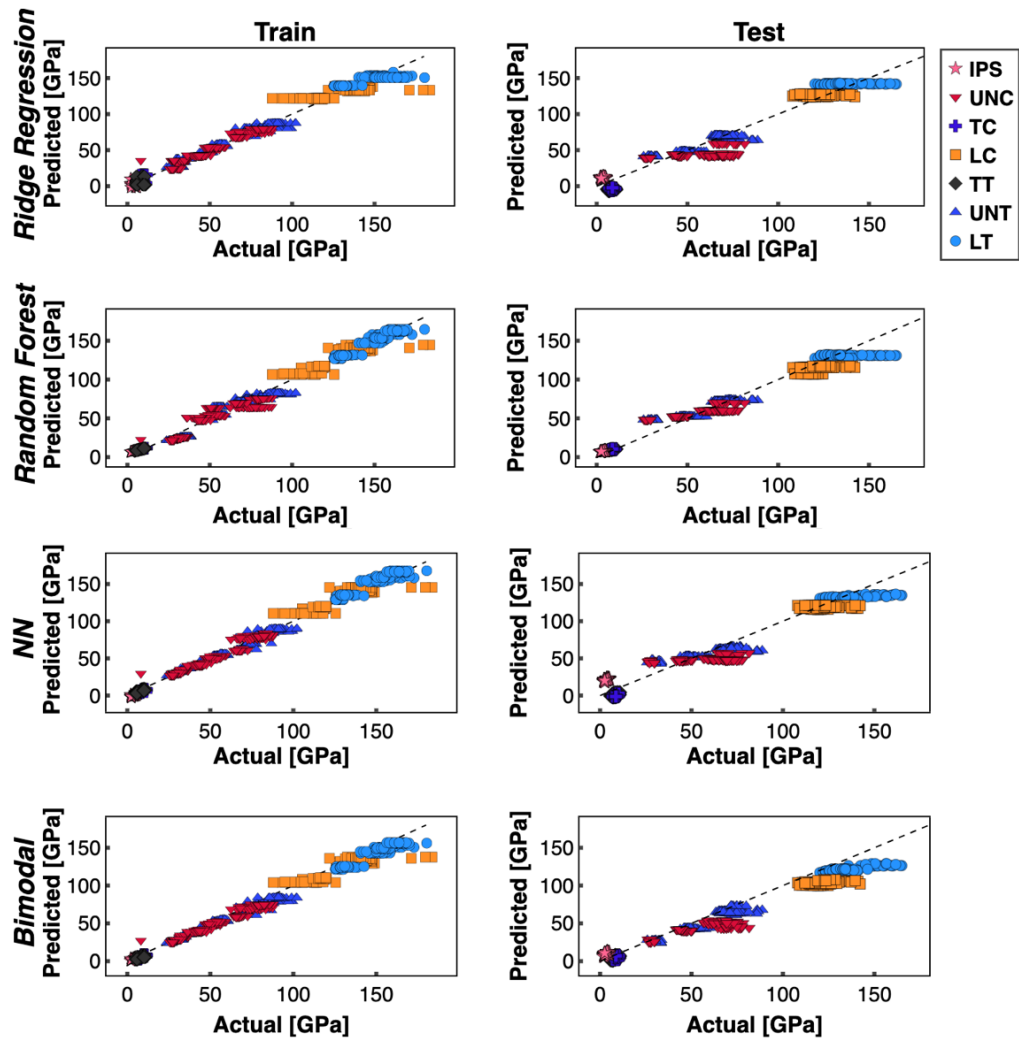

**Figure S4:** Training and testing results for all models. Modulus predicted by model is plotted against true modulus value across all models. For these data, the AS4 MTM45-1 material has been left for testing.

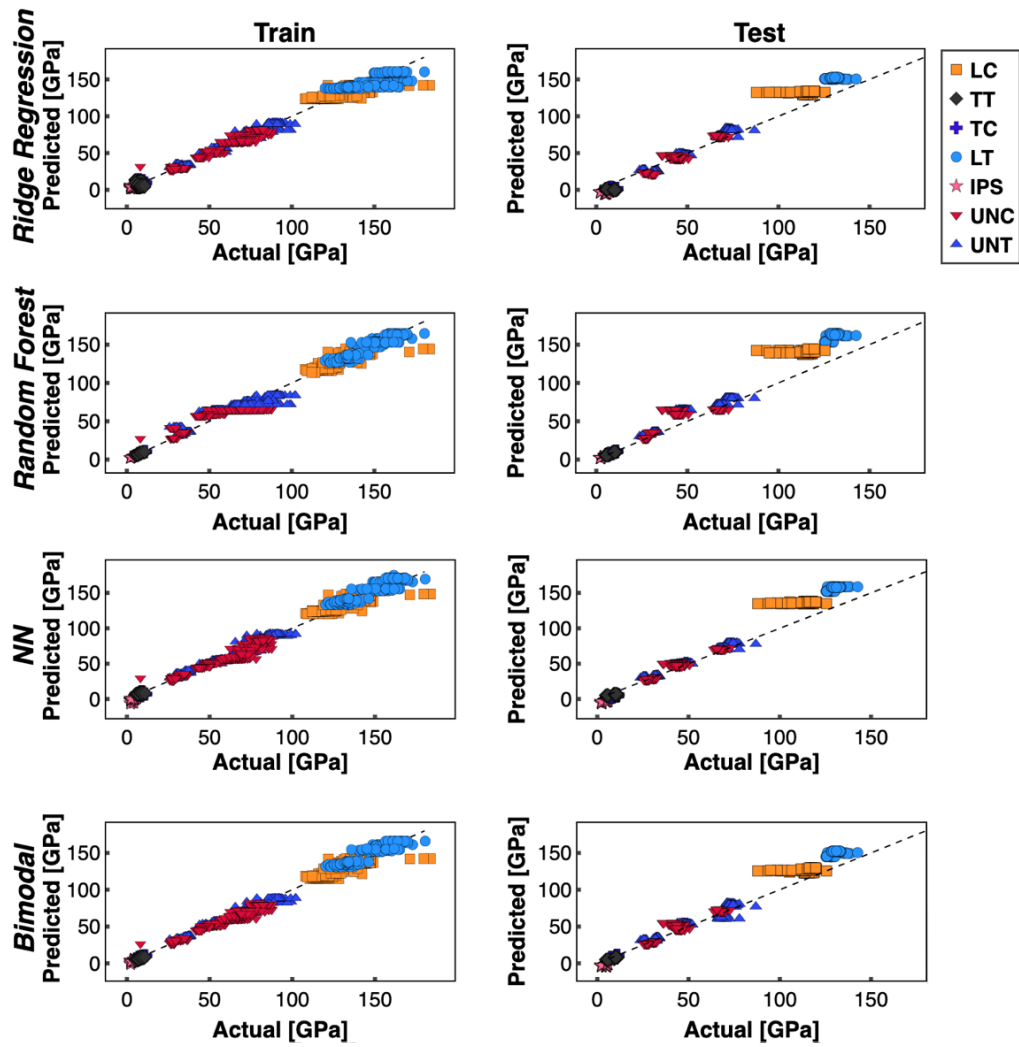

**Figure S5:** Training and testing results for all models. Modulus predicted by model is plotted against true modulus value across all models. For these data, the AS4 Hexcel 8552 material has been left for testing.

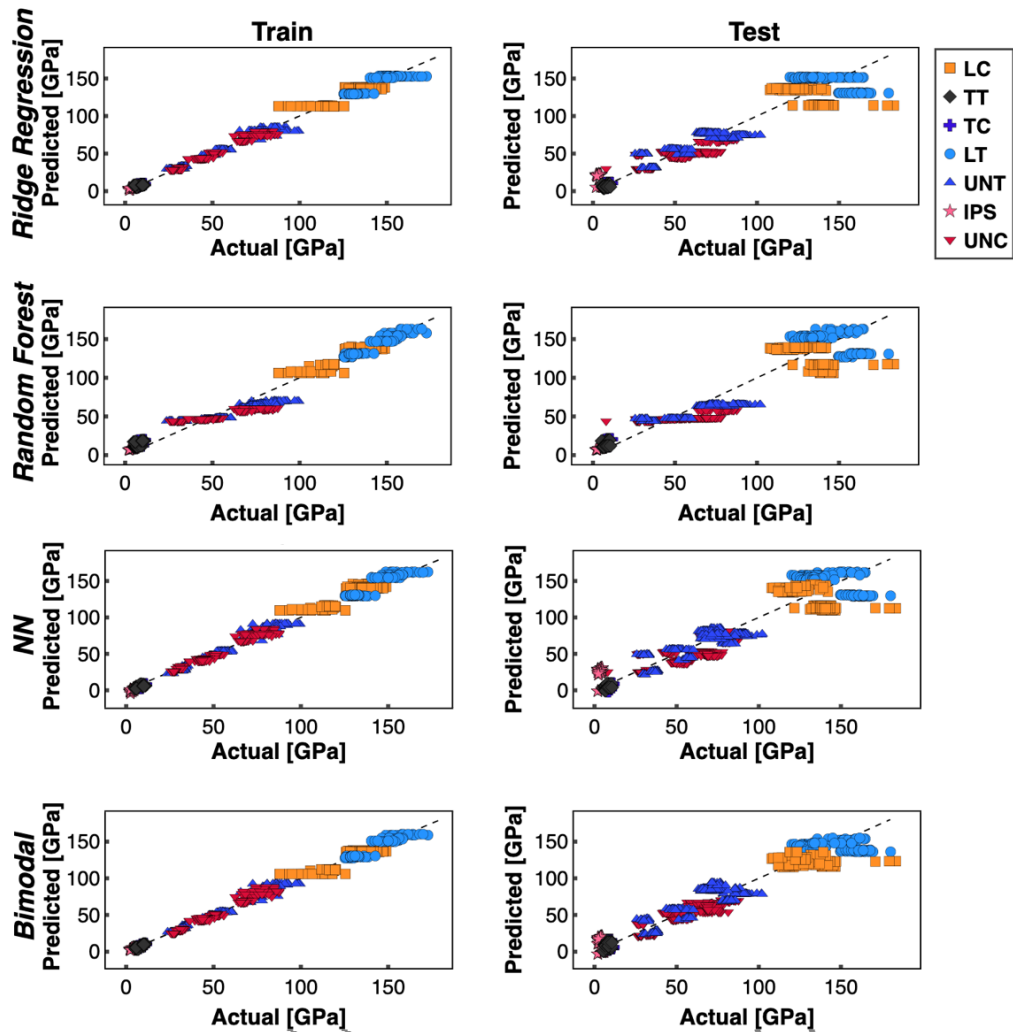

**Figure S6:** Training and testing results for all models. Modulus predicted by model is plotted against true modulus value across all models. For these data, the AS4 MTM45-1 and IM7 Hexcel 8552 materials have been left for testing.

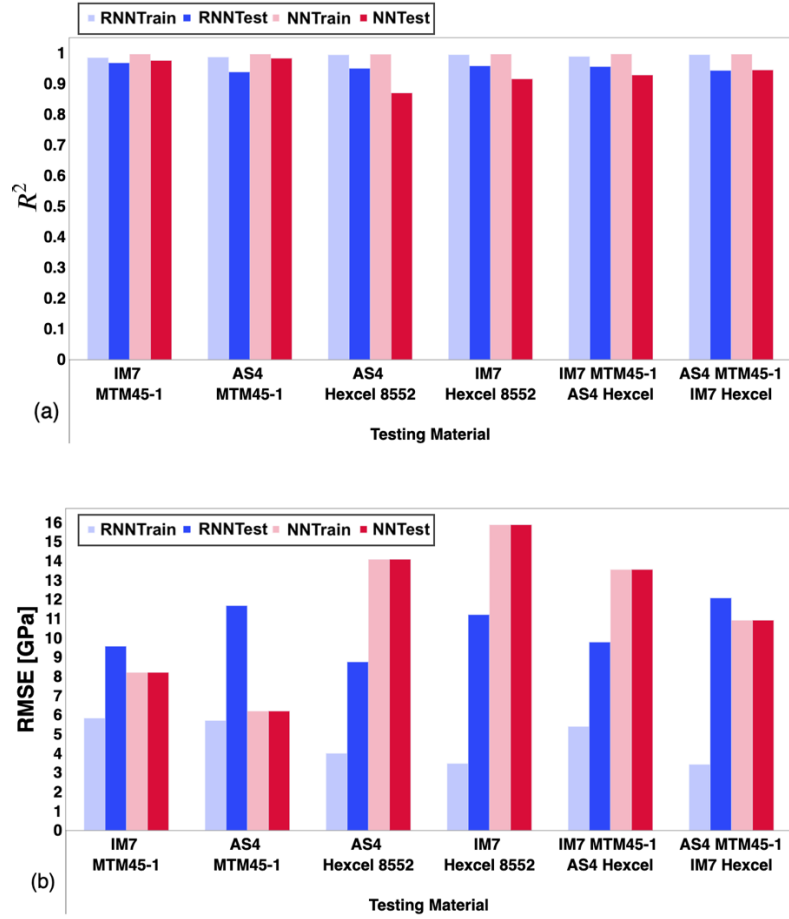

**Figure S7:** Performance of bimodal recurrent neural network and standard neural network models across different data splits. (a).  $R^2$  values for each model across each data split. (b) RMSE values for each model across each data split.

**Table S1:** Hyperparameters used for ridge regression models

| <b>Split</b>          | <b>Alpha</b> |
|-----------------------|--------------|
| No Hexcel AS4         | 0.5          |
| No Hexcel IM7         | 0.45         |
| No MTM AS4            | 0.4          |
| No MTM IM7            | 0.5          |
| No MTM IM7/Hexcel AS4 | 0.5          |
| No MTM AS4/Hexcel IM7 | 0.5          |

**Table S2:** Hyperparameters used for random forest models

| <b>Split</b>          | <b>Depth</b> | <b>Number Of Trees</b> |
|-----------------------|--------------|------------------------|
| No Hexcel AS4         | 10           | 100                    |
| No Hexcel IM7         | 8            | 500                    |
| No MTM AS4            | 10           | 400                    |
| No MTM IM7            | 7            | 500                    |
| No MTM IM7/Hexcel AS4 | 10           | 500                    |
| No MTM AS4/Hexcel IM7 | 7            | 200                    |

**Table S3:** Hyperparameters used for bimodal models

| <b>Split</b>          | <b>Dropout1</b> | <b>Dropout2</b> | <b>Layer1</b> | <b>Layer2</b> | <b>LearningRate</b> |
|-----------------------|-----------------|-----------------|---------------|---------------|---------------------|
| No Hexcel AS4         | 0.1             | 0.05            | 100           | 80            | 0.002575            |
| No Hexcel IM7         | 0.05            | 0.05            | 100           | 100           | 0.002575            |
| No MTM AS4            | 0.05            | 0.15            | 80            | 80            | 0.002575            |
| No MTM IM7            | 0.15            | 0.05            | 100           | 140           | 0.002575            |
| No MTM IM7/Hexcel AS4 | 0.05            | 0.05            | 140           | 140           | 0.002575            |
| No MTM AS4/Hexcel IM7 | 0.05            | 0.05            | 140           | 100           | 0.007525            |

**Table S4:** Hyperparameters used for bimodal models

| <b>Split</b>          | <b>Dropout1</b> | <b>Dropout2</b> | <b>Layer1</b> | <b>Layer2</b> | <b>LearningRate</b> | <b>RNN</b> |
|-----------------------|-----------------|-----------------|---------------|---------------|---------------------|------------|
| No Hexcel AS4         | 0.05            | 0.05            | 120           | 80            | 0.0034              | 2          |
| No Hexcel IM7         | 0.05            | 0.05            | 100           | 120           | 0.0034              | 2          |
| No MTM AS4            | 0.05            | 0.05            | 100           | 80            | 0.0034              | 3          |
| No MTM IM7            | 0.05            | 0.05            | 100           | 100           | 0.0067              | 3          |
| No MTM IM7/Hexcel AS4 | 0.05            | 0.05            | 100           | 120           | 0.0067              | 2          |
| No MTM AS4/Hexcel IM7 | 0.05            | 0.05            | 120           | 120           | 0.0001              | 3          |
